# Supplementary material for: Hepatitis C Virus RNA Replication Depends on Specific Cis- and Trans-Acting Activities of Viral Nonstructural Proteins
Source: PubMed Central journal article supplement (PMC4395149; doi:10.1371/journal.ppat.1004817), 2015-04-13
Supplement: ppat.1004817.s002.pdf [file ppat.1004817.s002.pdf]

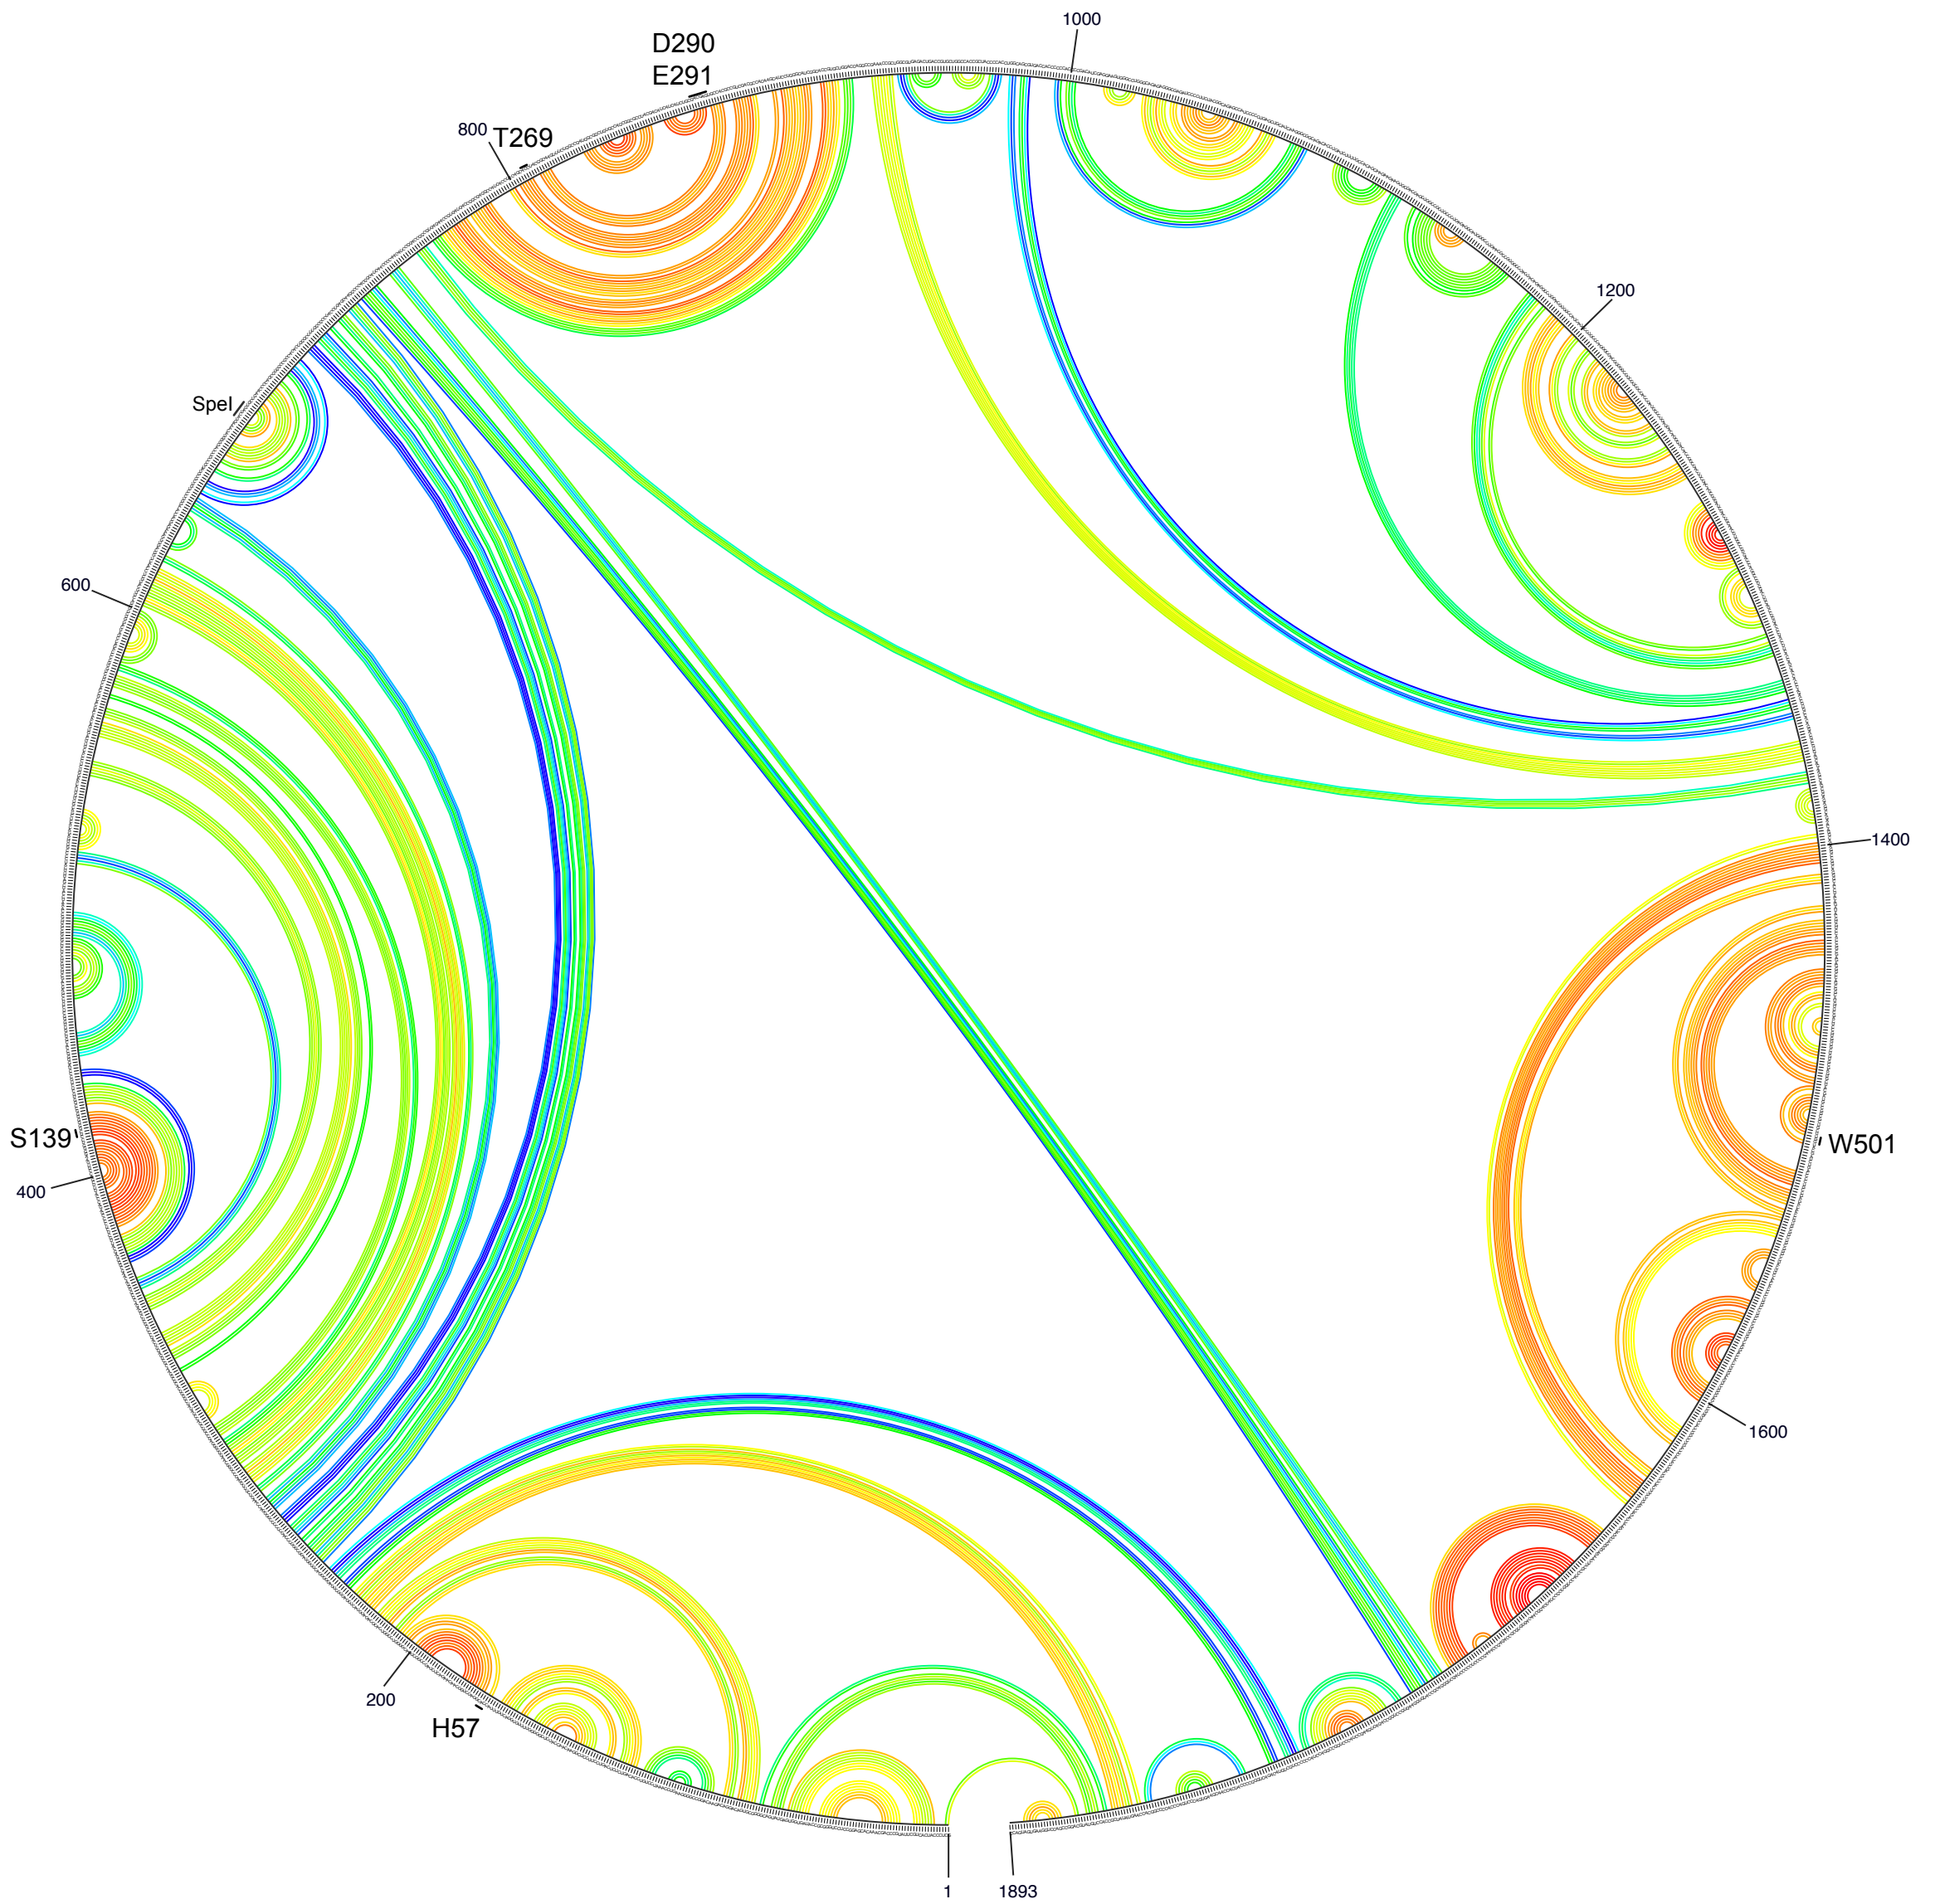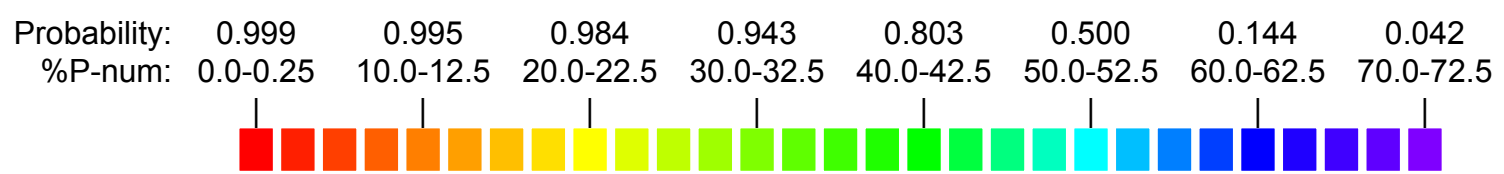

WT NS3 gene  
 $\Delta G = -738.17$  [Initially -804.70]

Kazakov, et al.  
 Figure S2A



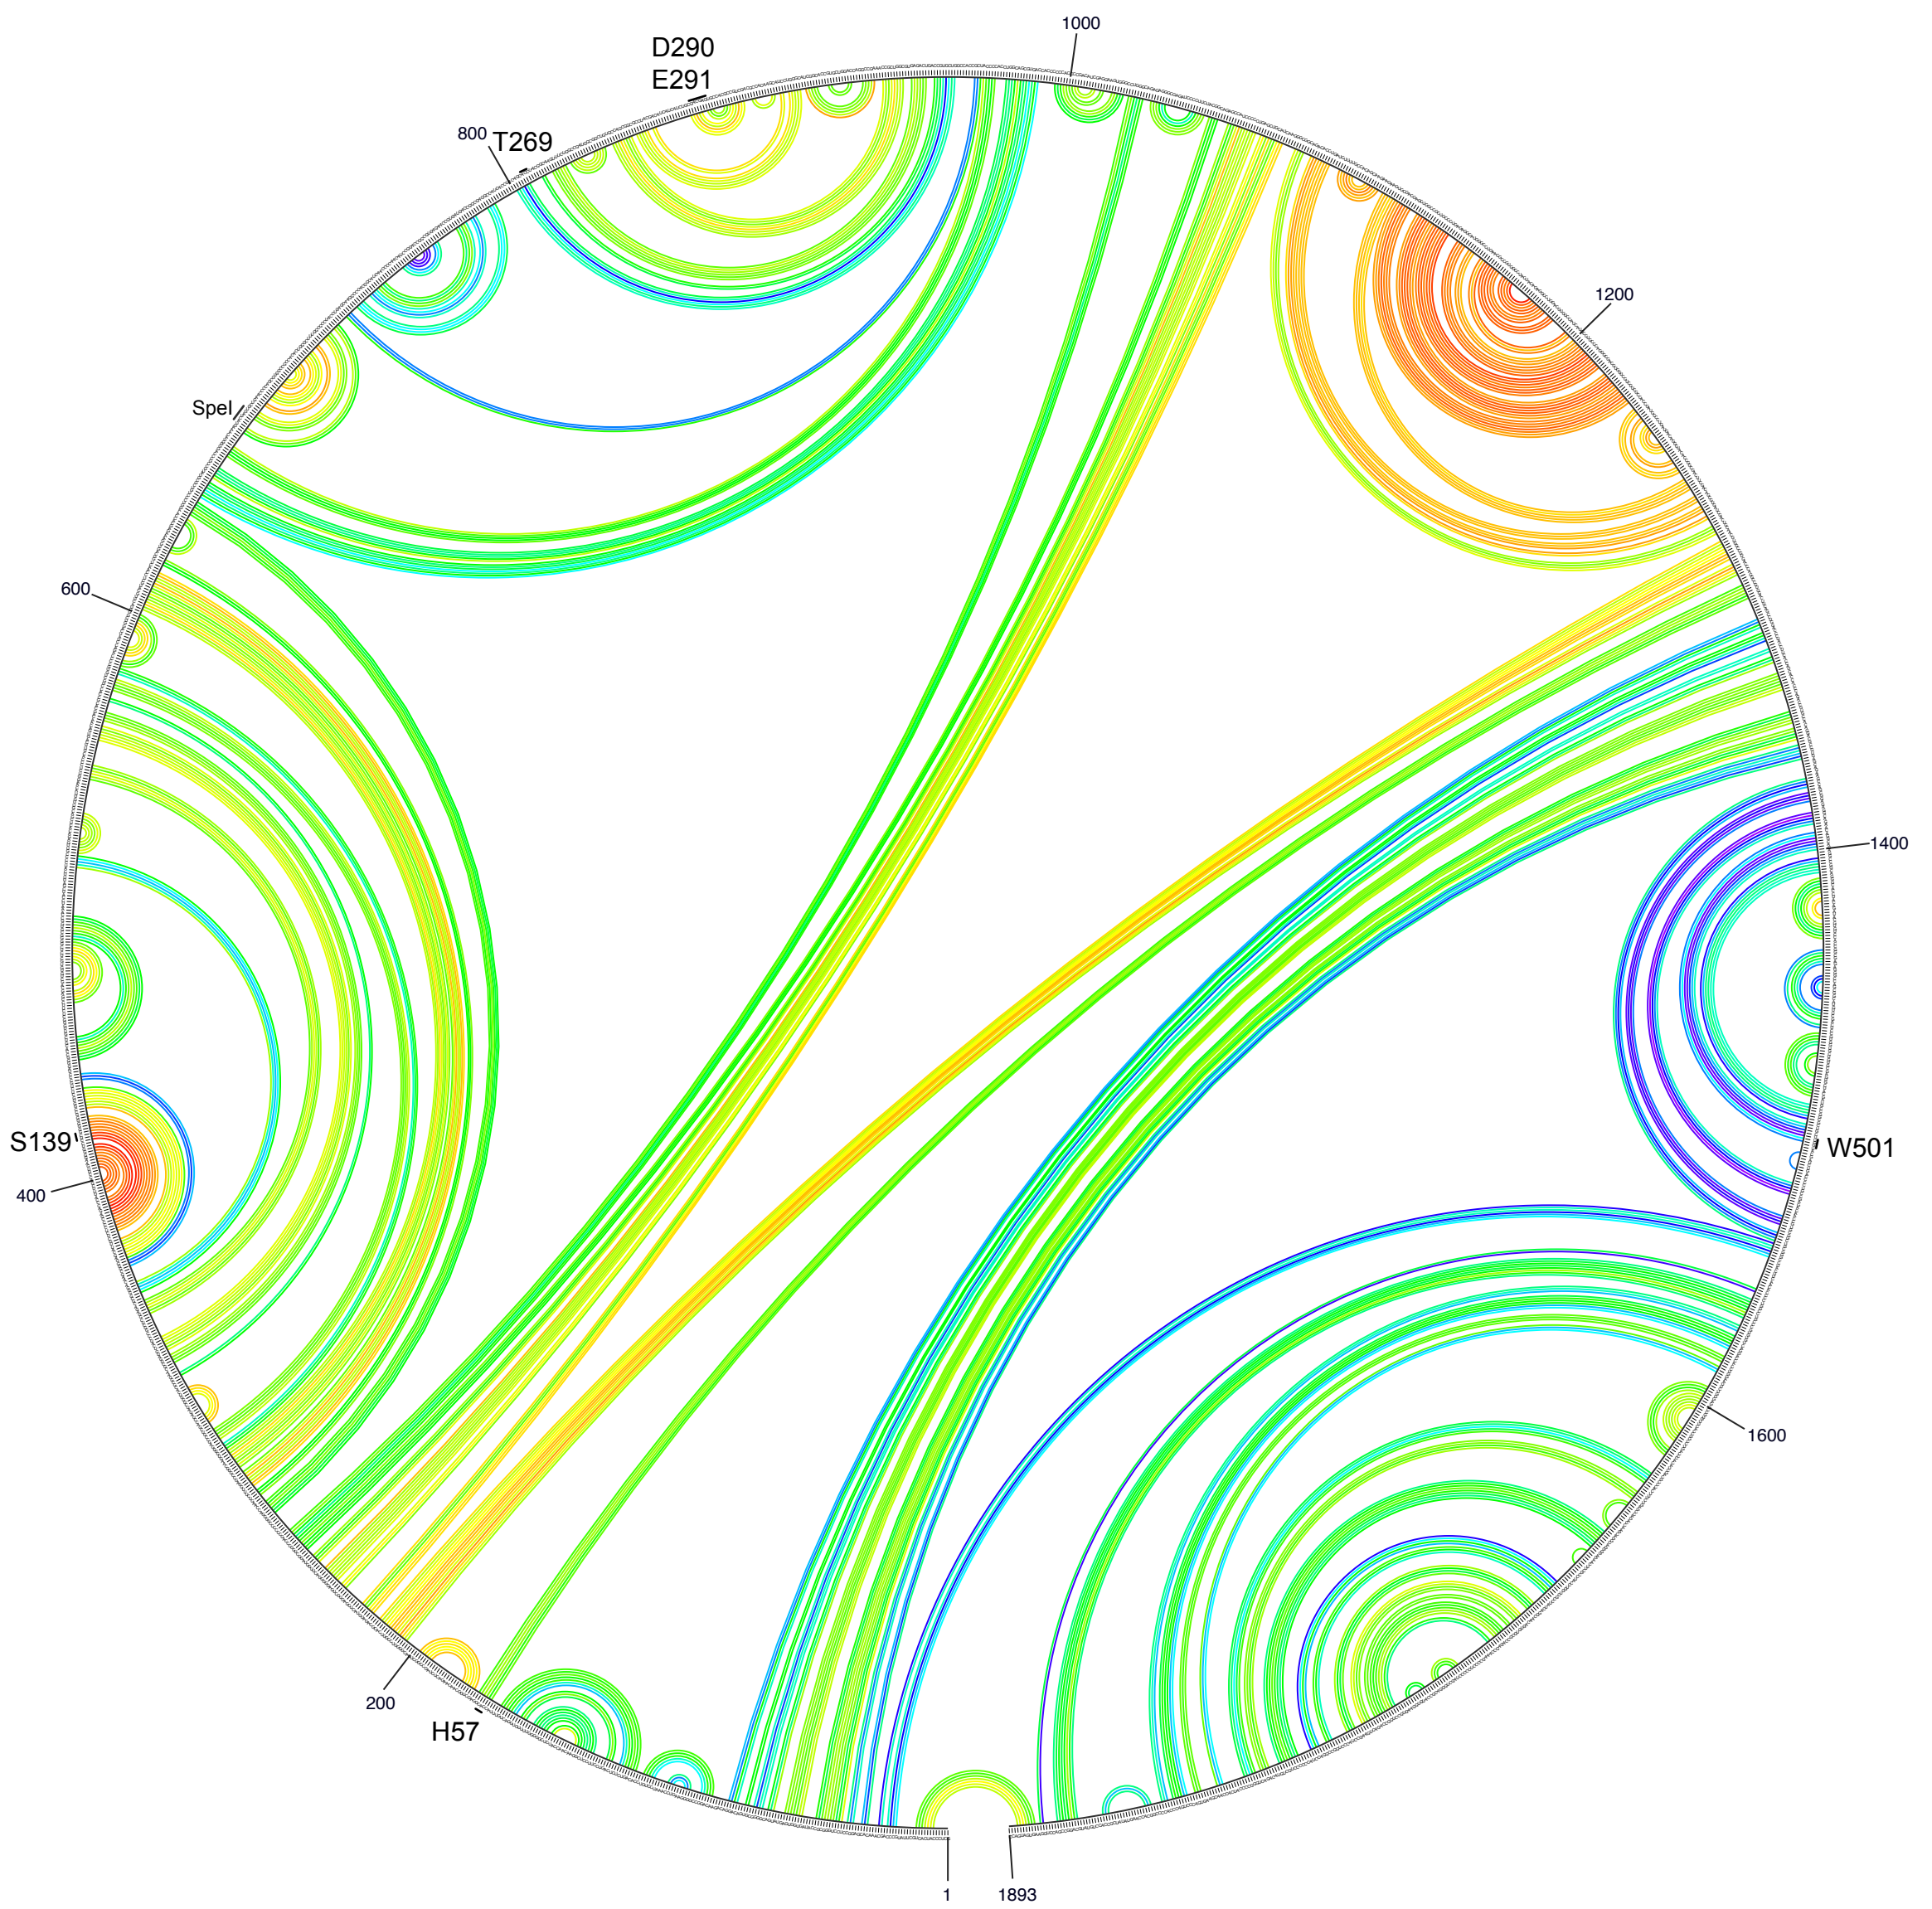

Recoded NS3 gene  
 $\Delta G = -729.88$  [Initially -805.30]

Kazakov, et al.  
S2B Figure

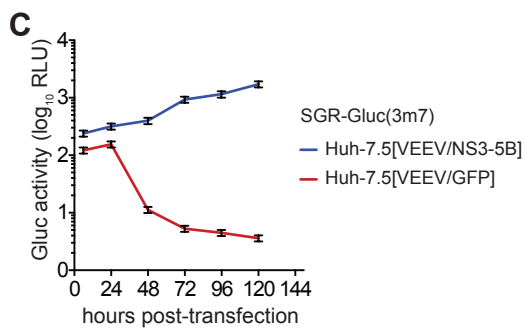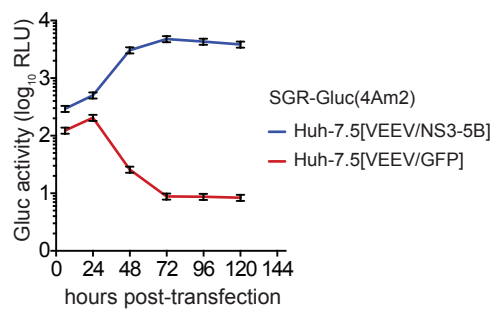

Kazakov, et al., S2C Figure
