# Supplementary material for: Hepatitis C Virus RNA Replication Depends on Specific Cis- and Trans-Acting Activities of Viral Nonstructural Proteins
Source: PubMed Central journal article supplement (PMC4395149; doi:10.1371/journal.ppat.1004817), 2015-04-13

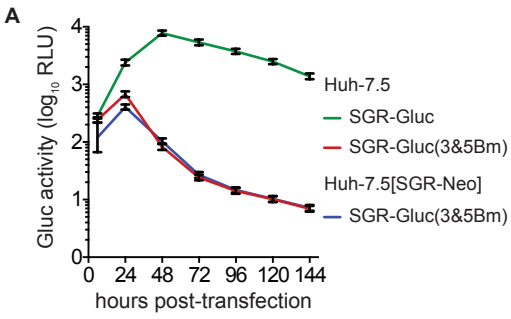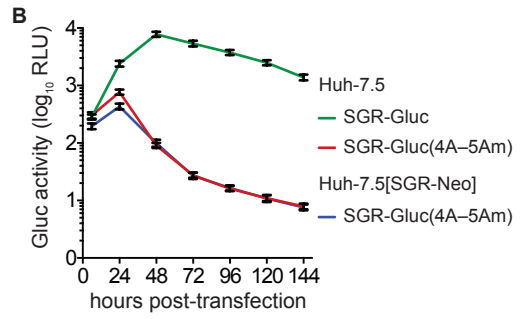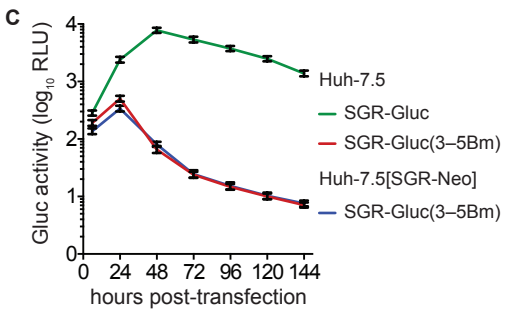

Supplement: ppat.1004817.s004.pdf [file ppat.1004817.s004.pdf]
